# Supplementary material for: Environmentally responsible synthesis of high-performance P2-Na2/3[Ni1/3Mn2/3]O2 sodium-ion battery cathodes
Source: Royal Society of Chemistry journal article supplement (doi:10.1039/d4ta03708a), 2024-01-01
Supplement: d4ta03708a1.pdf [file d4ta03708a1.pdf]

## Environmentally responsible synthesis of high-performance $\text{P2-Na}_{2/3}[\text{Ni}_{1/3}\text{Mn}_{2/3}]\text{O}_2$ sodium-ion battery cathodes

Jintao Fu,<sup>1</sup> Mohamed H. Hassan,<sup>1</sup> Jiaxin Liu,<sup>1</sup> Hyeongjun Koh,<sup>1</sup> Alexander K. Ng,<sup>1</sup> Chiara Bruzzi,<sup>1</sup>

John S. Corsi,<sup>1</sup> and Eric Detsi<sup>1\*</sup>

<sup>1</sup>Department of Materials Science & Engineering, University of Pennsylvania, Philadelphia, Pennsylvania 19104, USA

\* Corresponding author: ED [detsi@seas.upenn.edu](mailto:detsi@seas.upenn.edu)

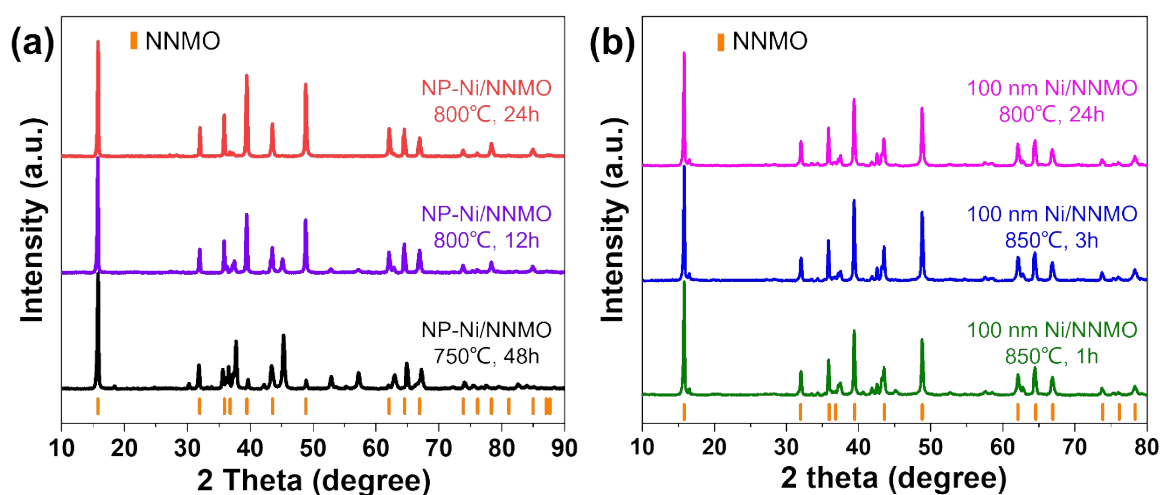

**Figure S1.** XRD profiles for NNMO converted from NP-Ni (a) and 100 nm Ni (b) under different annealing conditions. (a) For NP-Ni, the minimal requirement to yield full conversion is 24 h at 800 °C, (red), since shorter annealing time (purple) or lower temperature (black) contained impurities. (b) For 100 nm Ni, NNMO conversion is mostly achieved with an annealing time as short as 1 h at 850 °C (green). However, the impurity peaks remained despite extending the annealing time (blue and magenta).

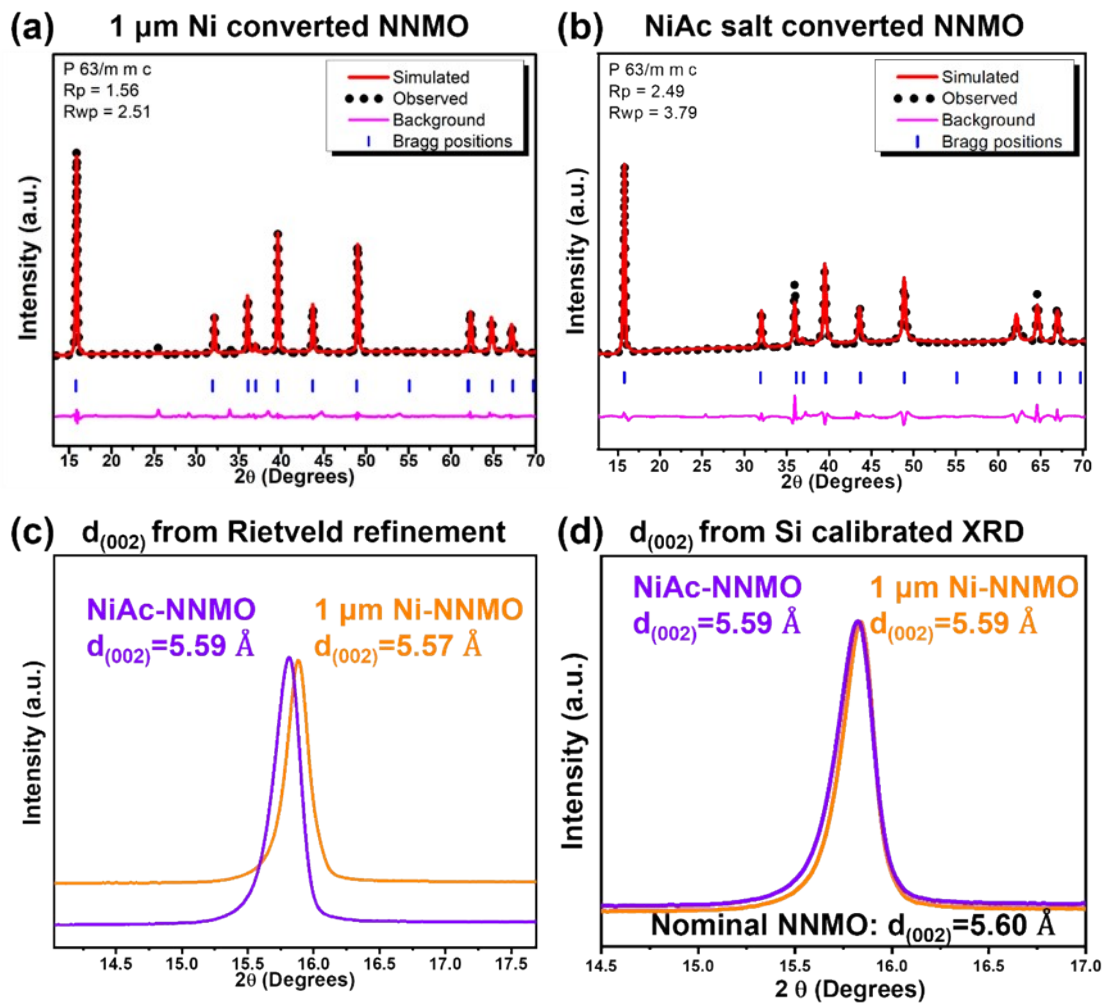

**Figure S2.** Rietveld refinement of (a) 1  $\mu\text{m}$  Ni-NNMO and (b) NiAc-NNMO, with the corresponding  $d_{(002)}$  spacing extracted from the refined results in (c). (d)  $d_{(002)}$  spacing calculated from Si powder calibrated XRD. In both (c) and (d), the layer spacings are smaller than nominal value of 5.60 Å, which originates from the Na-rich composition.

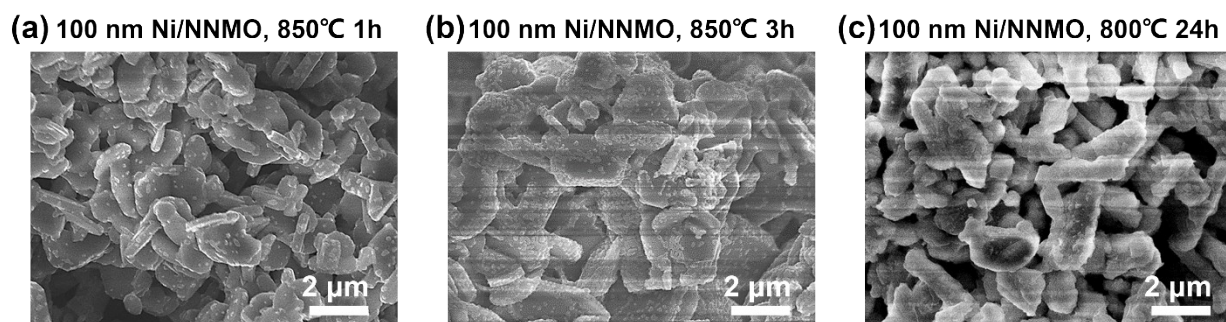

**Figure S3.** SEM images of NNMO converted from 100 nm Ni under different conditions. (a) Particles with a diameter of around 1 μm form after annealing for 1 h. (b-c) The particle size remains with extended annealing time.

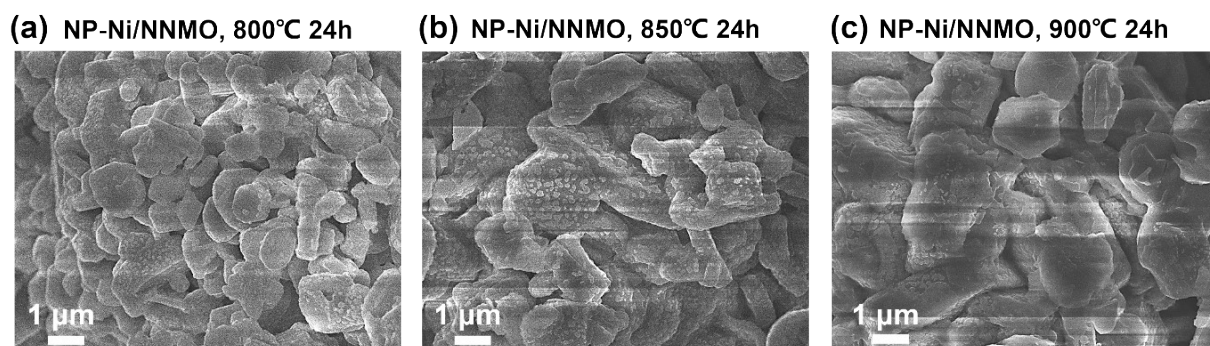

**Figure S4.** SEM images of NNMO converted from NP-Ni at different temperatures for 24 h. Particle coarsening is observed at higher temperature.

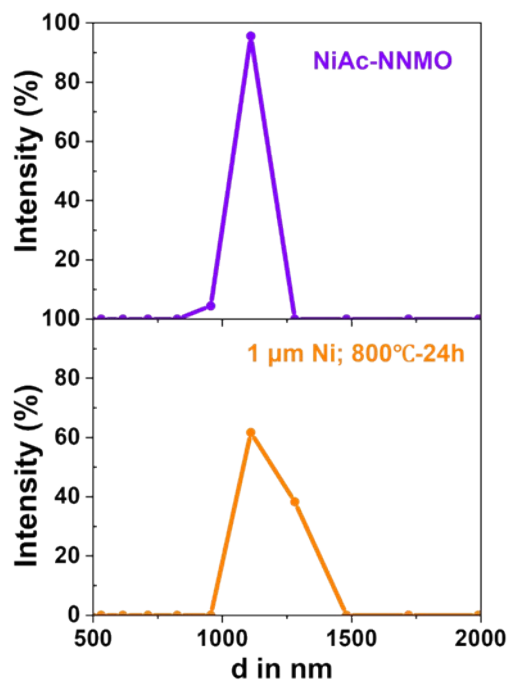

**Figure S5.** Dynamic light scattering (DLS) analysis of NiAc-NNMO (purple) and 1  $\mu\text{m}$  Ni-NNMO (orange), revealing the average particle sizes in consistent with the SEM observations.

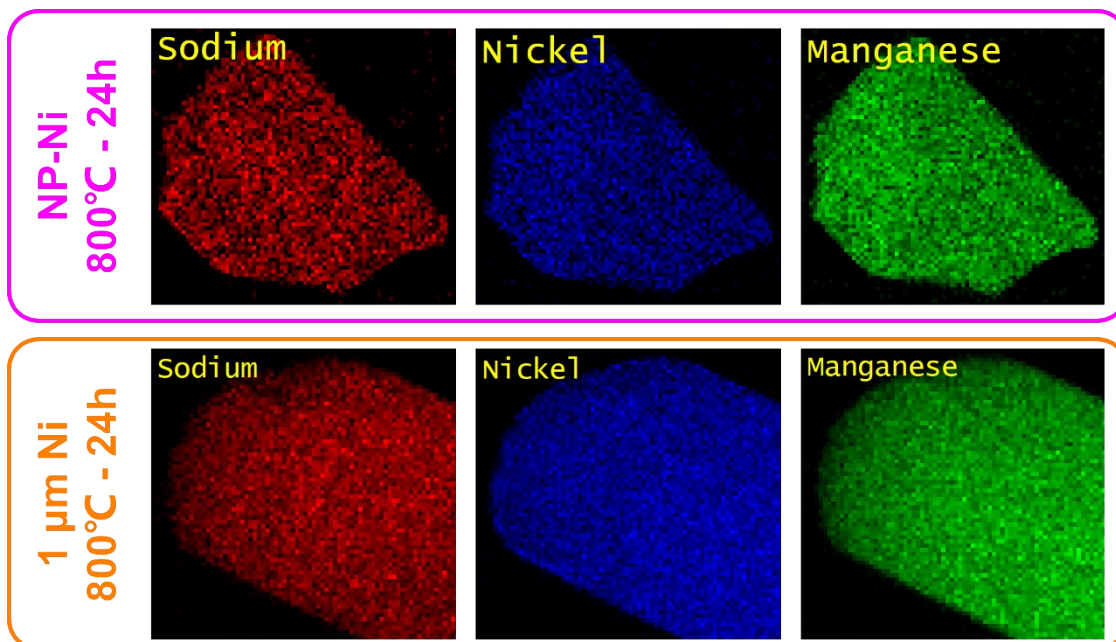

**Figure S6.** EDS maps of NNMO converted from NP-Ni (1<sup>st</sup> row) and 1  $\mu\text{m}$  Ni (2<sup>nd</sup> row), confirming the homogeneous mixing of elemental Na, Ni, and Mn after conversion.

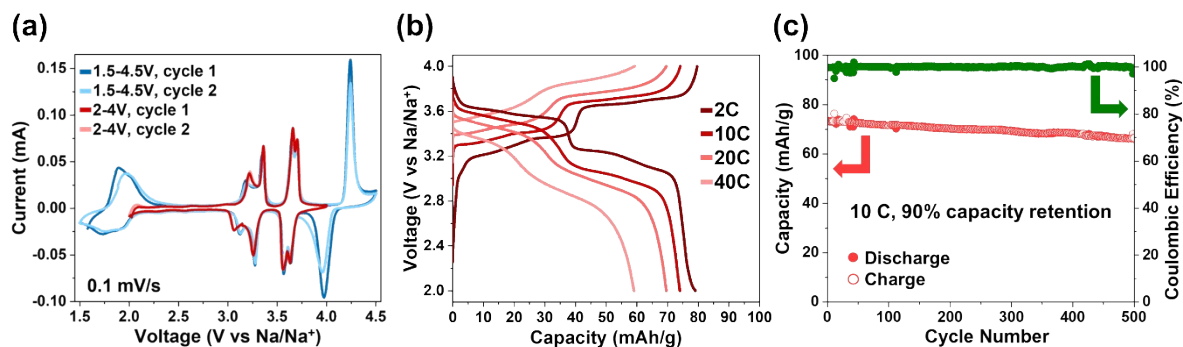

**Figure S7.** Cycling performance of NP-Ni converted NNMO as SIB cathode. (a) CV profile cycled between 2-4 V vs. Na/Na<sup>+</sup> (red) and  $\approx$  1.3-4.5 V vs. Na/Na<sup>+</sup> (blue). Decrease in peak intensity is observed for the latter case indicating structure change induced capacity decay. (b) Galvanostatic curves corresponding to the rate-capability test shown in **Figure 4b** in the main manuscript. (c) Long-term cycling at 10 C between 2-4 V vs. Na/Na<sup>+</sup>. 90% capacity retention is achieved over 500 cycles.

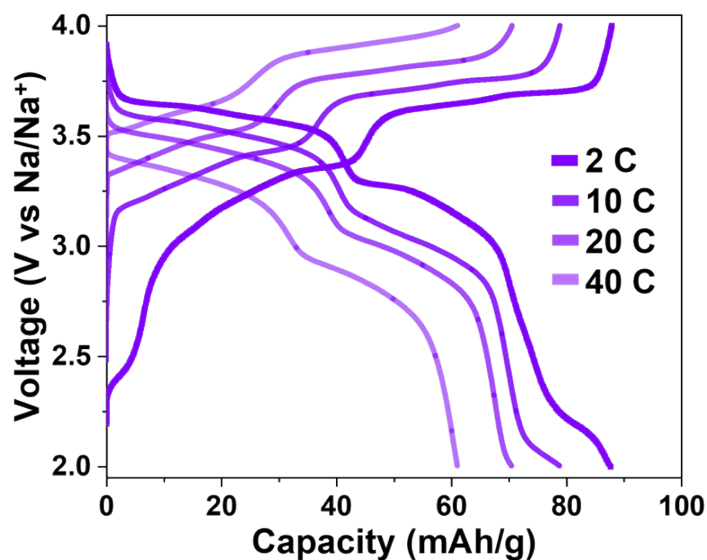

**Figure S8.** Galvanostatic curves of Ni acetate salt converted NNMO corresponding to the rate-capability test shown in **Figure 4b** in the main manuscript.

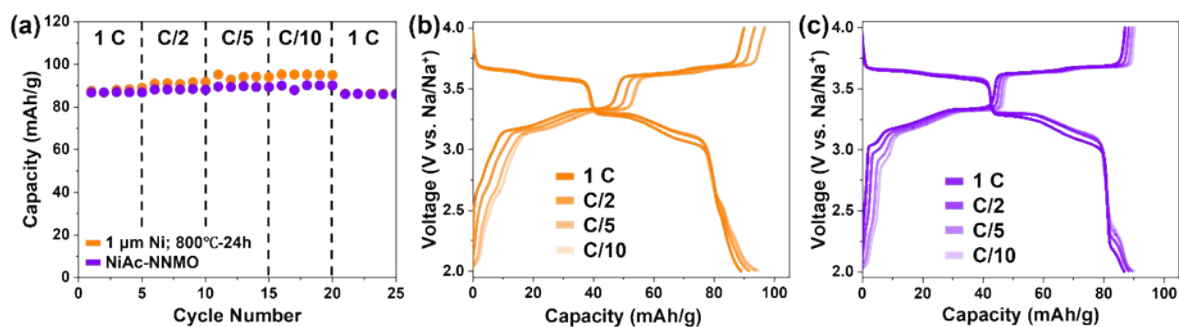

**Figure S9.** Rate-capability of NNMO converted from 1  $\mu\text{m}$  Ni (orange) and Ni acetate salt (purple) cycled between 2-4 V vs.  $\text{Na}/\text{Na}^+$ , with the corresponding galvanostatic curves of 1  $\mu\text{m}$  Ni-NNMO in (b) and NiAc-NNMO in (c).

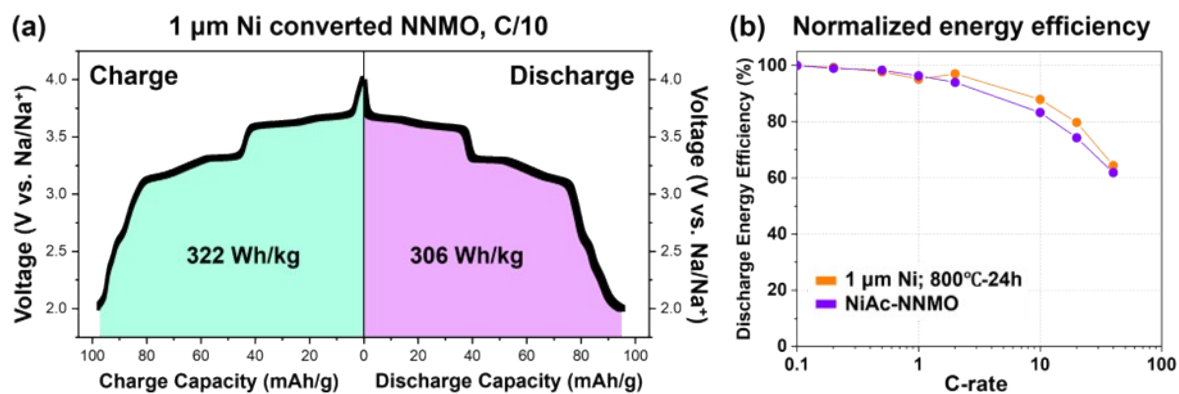

**Figure S10.** (a) Energy density of 1  $\mu\text{m}$  Ni-NNMO at C/10 based on the E-Q profile. (b) Normalized energy efficiency against the slowest C-rate of C/10. Both 1  $\mu\text{m}$  Ni-NNMO (orange) and NiAc-NNMO (purple) maintain >95% energy efficiency up to 1 C, and >60% energy efficiency at 40 C.

### Kinetic analysis

Kinetic analysis is performed in the case of NP-Ni-NNMO to gain further insight into the reaction mechanism. **Figure S8a-b** shows the CV of NP-Ni-NNMO under different scan rates from 0.1 mV/s to



50 mV/s. The peak current ( $i$ ) can be expressed as a function of scan rate ( $v$ ) as **Eq. 1**:<sup>1,2</sup>

$$i = a \cdot v^b \text{ (Eq. 1)}$$

where  $a$  and  $b$  are constants. The value of  $b$  varies between 0.5-1, with  $b=0.5$  referring to a diffusion-controlled process (slow) and  $b=1$  referring to a capacitive process (fast).<sup>2</sup> Taking logarithm on both sides of **Eq. 2**, an equivalent equation can be obtained:

$$\log(i) = \log(a) + b \cdot \log(v) \text{ (Eq. 2)}$$

**Figure S11c** shows such a log-log plot of peak current vs. scan rate, where the anodic and cathodic peak currents are taken from **Figure S11a-b** marked with “A” and “C”, respectively. For scan rate up to 1 mV/s (corresponding to an equivalent C-rate of 0.9 C), the  $b$ -values for both the anodic and cathodic process were above 0.8, indicating the Na insertion/extraction behavior is more similar to a capacitor. For scan rates 1-10 mV/s (corresponding to an equivalent C-rate of 0.9-9 C), the  $b$ -values dropped to  $\sim 0.7$ , suggesting the onset of diffusion-controlled kinetics,<sup>2</sup> while this value is still higher than other P2-NNMO (0.5-0.6).<sup>3</sup> Thus, our kinetic analysis result is consistent with the observed high rate-capability.

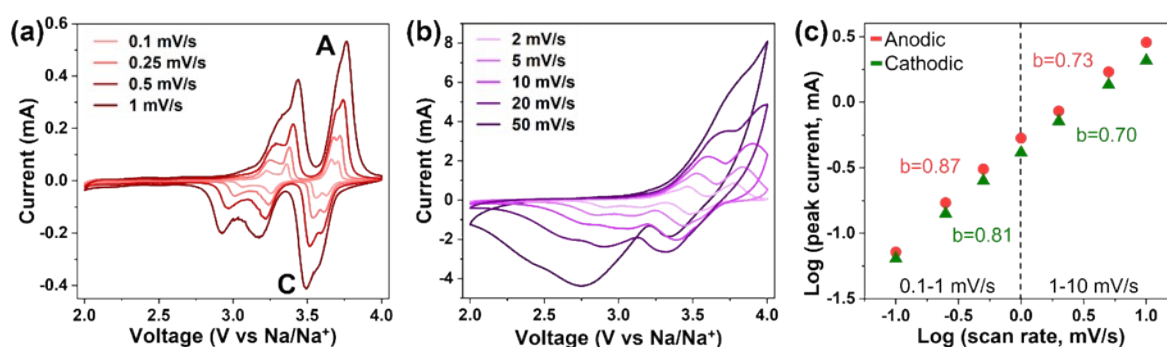

**Figure S11.** (a-b) Cyclic voltammetry of NP-Ni converted NNMO at different scan rates. (c) The linear relationship between peak current and scan rate in a log-log plot to obtain the  $b$ -values.

## References:

- 1 H. Lindström, S. Södergren, A. Solbrand, H. Rensmo, J. Hjelm, A. Hagfeldt and S.-E. Lindquist, *J Phys Chem B*, 1997, 101, 7717–7722.
- 2 B. K. Lesel, J. S. Ko, B. Dunn and S. H. Tolbert, *ACS Nano*, 2016, 10, 7572–7581.
- 3 Y. Liu, Q. Shen, X. Zhao, J. Zhang, X. Liu, T. Wang, N. Zhang, L. Jiao, J. Chen and L.-Z. Fan, *Adv Funct Mater*, 2020, 30, 1907837.
